# Supplementary material for: Catalytic outgrowth of SnO2 nanorods from ZnO–SnO2 nanoparticles microsphere core: combustion synthesis and gas-sensing properties
Source: Royal Society of Chemistry journal article supplement (doi:10.1039/c2ce25810b), 2012-01-01
Supplement: c2ce25810b.pdf [file c2ce25810b.pdf]

Supporting Information

# Catalytic Outgrowth of SnO<sub>2</sub> Nanorods from ZnO - SnO<sub>2</sub> Nanoparticles Microsphere Core: Combustion Synthesis and Gas-Sensing Properties

Yuming Cui,<sup>a</sup> Ang Yu,<sup>a</sup> Hao Pan,<sup>a</sup> Xingfu Zhou<sup>\*a</sup>, and Weiping Ding<sup>b</sup>

<sup>a</sup> State Key Laboratory of Materials-Oriented Chemical Engineering

College of Chemistry and Chemical Engineering, Nanjing University of Technology, Nanjing 210009 (P.R. China). E-mail: zhouxf@njut.edu.cn

<sup>b</sup> Key Lab of Mesoscopic Chemistry School of Chemistry and Chemical Engineering, Nanjing University, Nanjing 210093 (P.R. China).

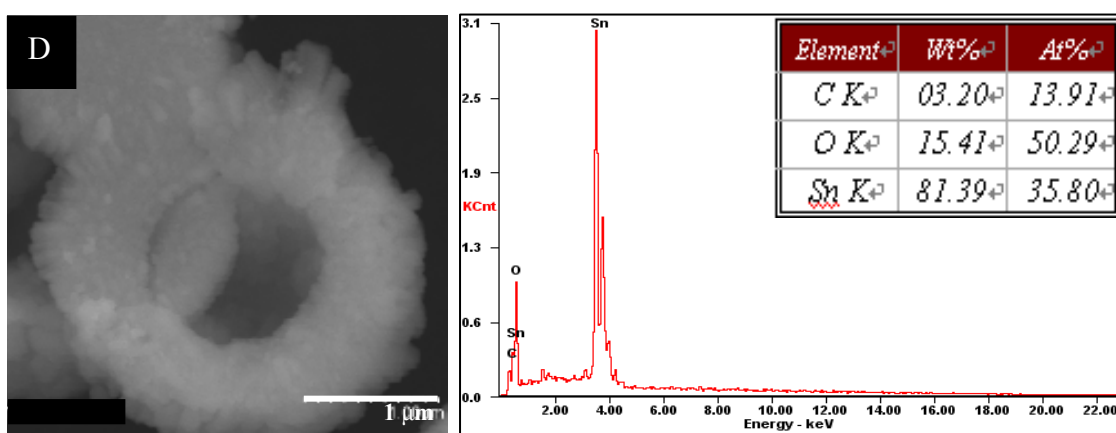

Fig S1. FESEM micrographs and EDS patterns of the samples obtained after hydrothermal reaction with HCl etching.
